# Supplementary material for: The catalytically defective receptor protein tyrosine kinase EphA10 promotes tumorigenesis in pancreatic cancer cells
Source: PubMed Central journal article supplement — Cancer Sci. 2020 Jul 27;111(9):3292–302. doi: 10.1111/cas.14568 (PMC7469775; doi:10.1111/cas.14568), 2020-07-27
Supplement: CAS-111-3292-s001.pdf [file CAS-111-3292-s001.pdf]

## Supporting Information

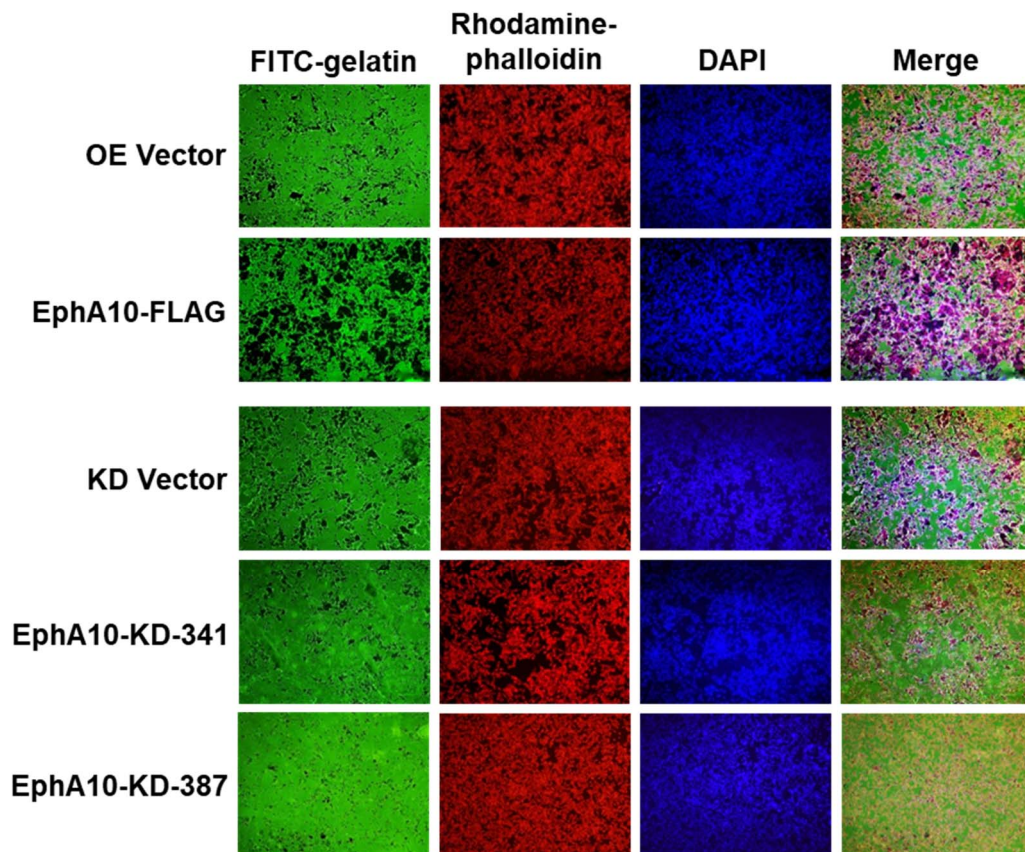

**Figure S1. Gelatin degradation in EphA10-overexpressing or -silencing MIA PaCa-2 cells.**

MIA PaCa-2 cells were plated on FITC-gelatin (green)-coated cover glasses and incubated for 48 h at 37°C. The cells stained with rhodamine-phalloidin (red) and DAPI (blue) were analyzed by fluorescence microscopy ( $\times 100$ ).
