# Supplementary material for: The catalytically defective receptor protein tyrosine kinase EphA10 promotes tumorigenesis in pancreatic cancer cells
Source: PubMed Central journal article supplement — Cancer Sci. 2020 Jul 27;111(9):3292–302. doi: 10.1111/cas.14568 (PMC7469775; doi:10.1111/cas.14568), 2020-07-27
Supplement: CAS-111-3292-s002.pdf [file CAS-111-3292-s002.pdf]

## Supporting Information

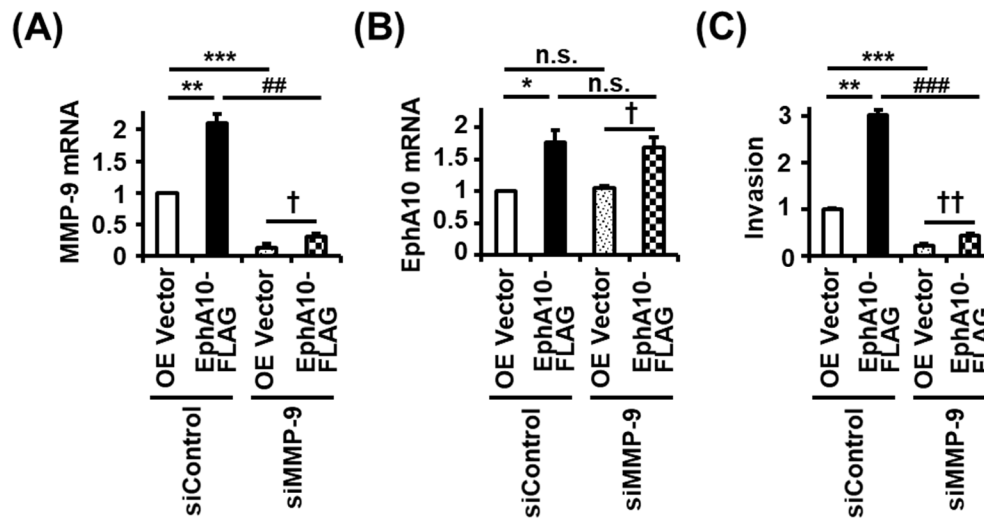

**Figure S2. Effect of MMP-9 knockdown on invasion of MIA PaCa-2 cells with or without EphA10 overexpression.**

Control siRNA (siControl) and human MMP-9 siRNA (siMMP-9) mixtures were transfected to MIA PaCa-2 cells infected with lentiviruses for overexpression vector control (OE Vector) and EphA10 overexpression (EphA10-FLAG). After 2 days, the cells were analyzed for mRNA levels of MMP-9 (A) and EphA10 (B) using quantitative RT-PCR and for invasion assay (C). Each bar represents the mean  $\pm$  standard deviation from three independent experiments. \* $P < 0.05$ , \*\* $P < 0.01$ , \*\*\* $P < 0.001$  vs. siControl and OE vector control; † $P < 0.05$ , †† $P < 0.01$ , vs. siMMP-9 and OE vector control; and ## $P < 0.01$ , ### $P < 0.001$  vs. siControl and EphA10-FLAG.
