# Supplementary material for: The catalytically defective receptor protein tyrosine kinase EphA10 promotes tumorigenesis in pancreatic cancer cells
Source: PubMed Central journal article supplement — Cancer Sci. 2020 Jul 27;111(9):3292–302. doi: 10.1111/cas.14568 (PMC7469775; doi:10.1111/cas.14568), 2020-07-27
Supplement: CAS-111-3292-s003.pdf [file CAS-111-3292-s003.pdf]

## Supporting Information

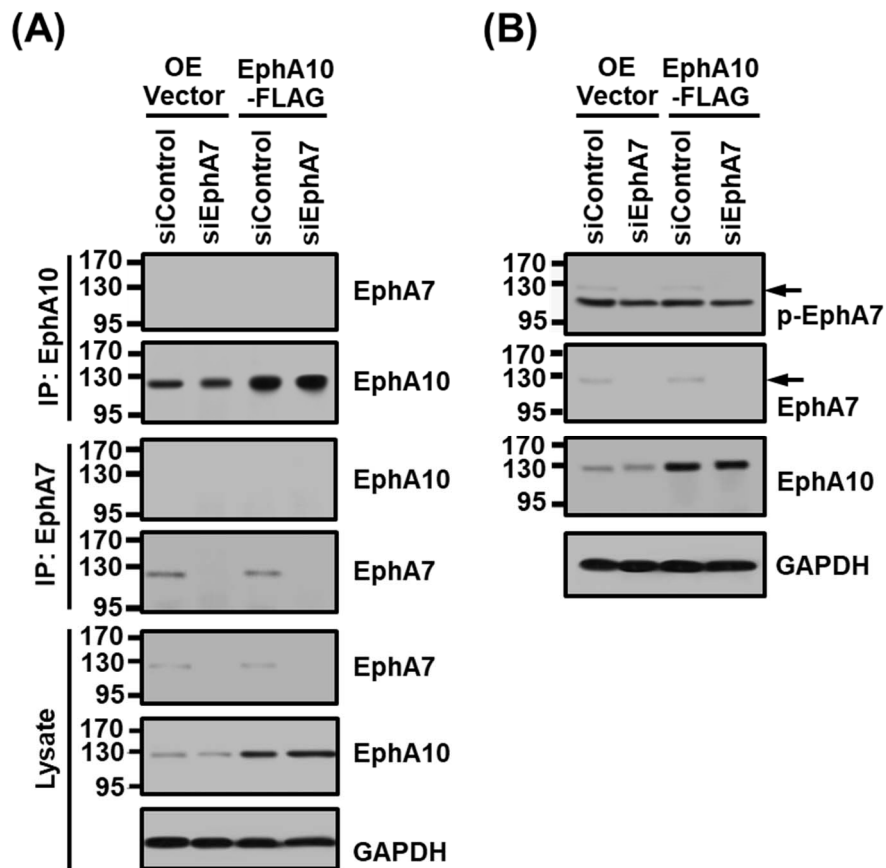

**Figure S3. Interaction of EphA10 with EphA7 in MIA PaCa-2 cells**

human EphA7 siRNA (siEphA7) and control siRNA (siControl) mixtures (Dharmacon) were transfected to MIA PaCa-2 cells overexpressing EphA10 (EphA10-FLAG) and transfected with overexpression vector (OE Vector). (A) The interaction of EphA10 with EphA7 in MIA PaCa-2 cells was analyzed by reciprocal immunoprecipitation. The precipitated proteins were analyzed by western blotting using the indicated antibodies. (B) The change of EphA7 phosphorylation by overexpression of EphA10 was analyzed in MIA PaCa-2 cells. The level of EphA7 phosphorylation was assessed by western blotting using phospho-EphA7 and EphA7 antibodies.
